# Supplementary material for: S-allyl cysteine reduces osteoarthritis pathology in the tert-butyl hydroperoxide-treated chondrocytes and the destabilization of the medial meniscus model mice via the Nrf2 signaling pathway
Source: publisher site journal article supplement (doi:10.18632/aging.103757), 2020-10-05
Supplement: Supplementary file [file aging-v12i19-103757-supplementary-material-SD1.pdf]

**SUPPLEMENTARY FIGURES**

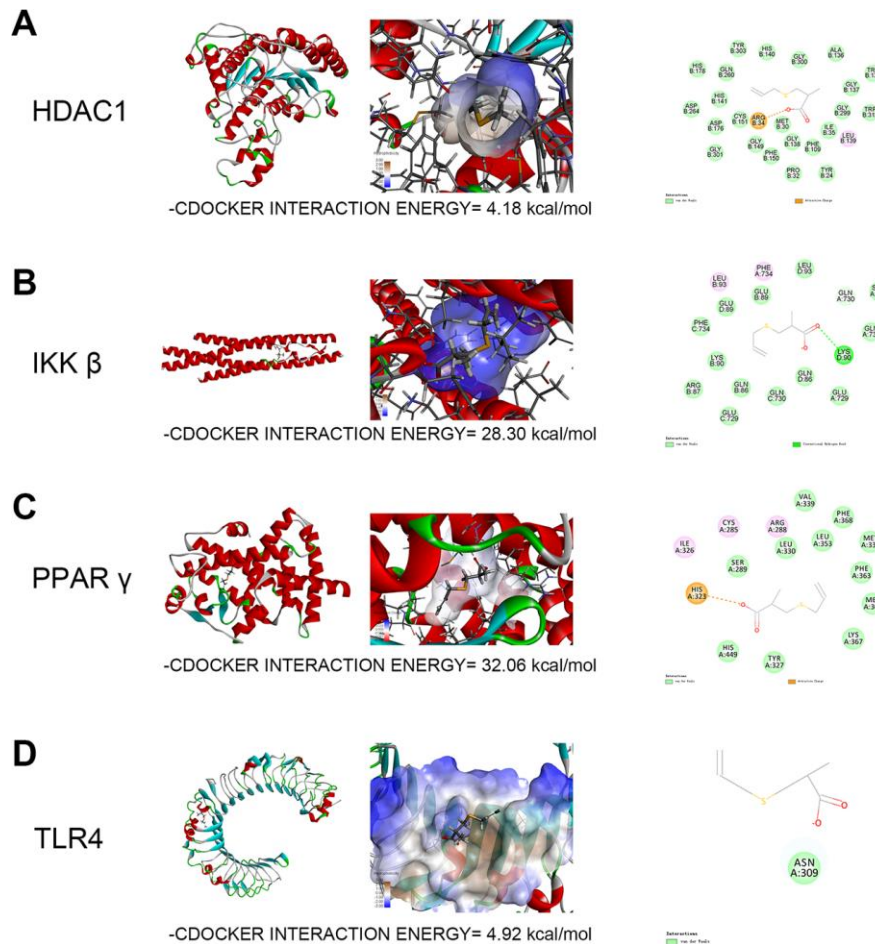

**Supplementary Figure 1. Molecular docking analysis of SAC and its potential binding partners, HDAC1, IKK $\beta$ , PPAR $\gamma$ , and TLR4.** (A) The 3D docking model shows -CDOCKER interaction energy value of 4.18 kcal/mol for the interactions between SAC and HDAC1 molecules. The 2D binding model between SAC and HDAC1 demonstrates 23 van der Waals interactions, 1 alkyl interaction, and 1 salt bridge between HDAC1 and SAC molecules. (B) The 3D docking model shows -CDOCKER interaction energy value of 28.3 kcal/mol for the interactions between SAC and IKK $\beta$  molecules. The 2D binding model between SAC and IKK $\beta$  demonstrates 14 van der Waals interactions, 2 alkyl interactions, and 1 carbon-hydrogen bond between IKK $\beta$  and SAC molecules. (C) The 3D docking model shows -CDOCKER interaction energy value of 32.06 kcal/mol for the interactions between SAC and PPAR $\gamma$  molecules. The 2D binding model between SAC and PPAR $\gamma$  demonstrates 11 van der Waals interactions, 3 alkyl interactions, and 1 salt bridge between SAC and PPAR $\gamma$  molecules. (D) The 3D docking model shows -CDOCKER interaction energy value of 4.92 kcal/mol for the interactions between SAC and TLR4 molecules. The 2D binding model between SAC and TLR4 demonstrates 1 van der Waals interaction between SAC and TLR4.

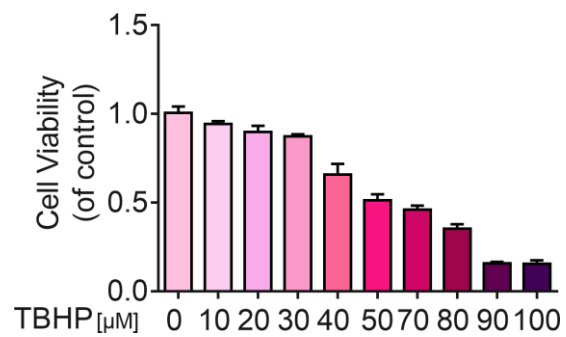

Supplementary Figure 2. CCK8 assay results show the viability of chondrocytes treated with different concentrations of TBHP for 2 h.
